# Supplementary material
Source: PubMed Central journal article supplement (PMC5446475)
Supplement: ajcr0007-1068-f8.pdf [file ajcr0007-1068-f8.pdf]

Flot2 promotes HCC growth and metastasis through modulating cell cycle and inducing EMT

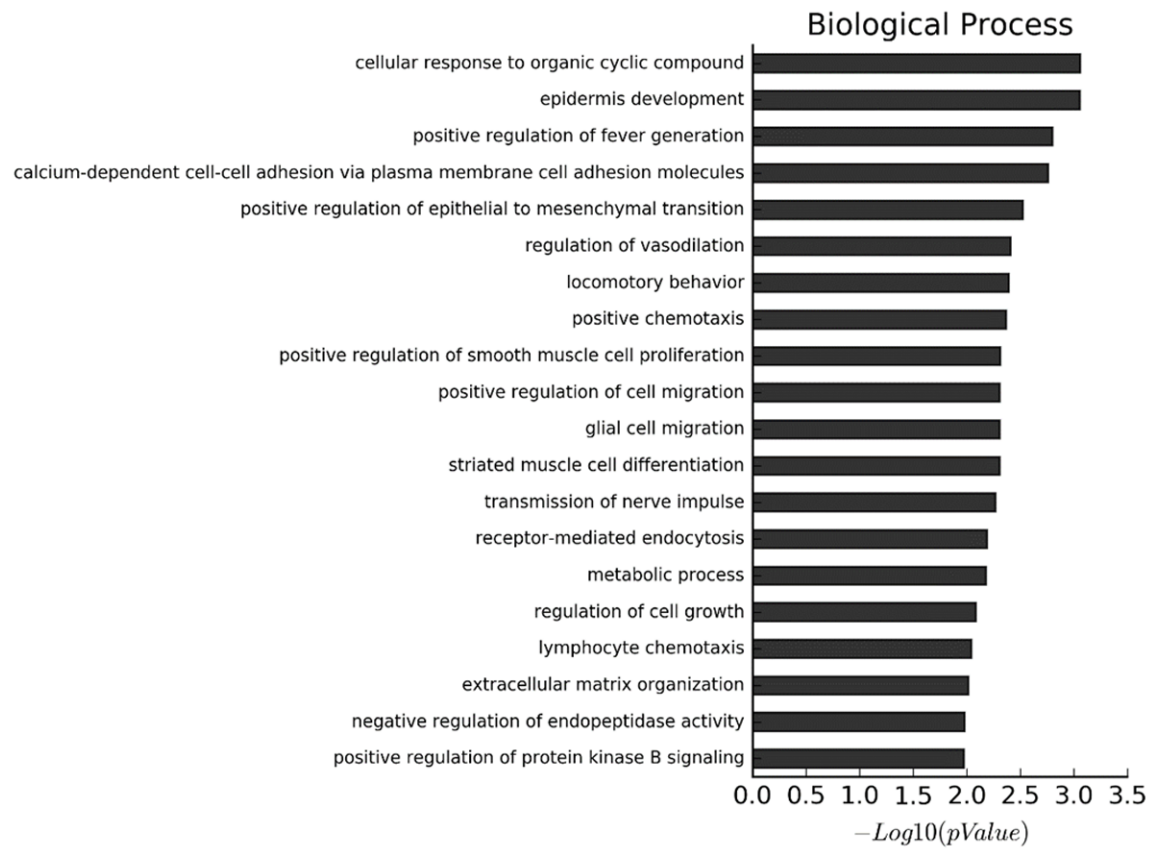

Supplementary Figure 1. Microarray analysis of Flot2-overexpressed HCC cells: GO analysis.

Flot2 promotes HCC growth and metastasis through modulating cell cycle and inducing EMT

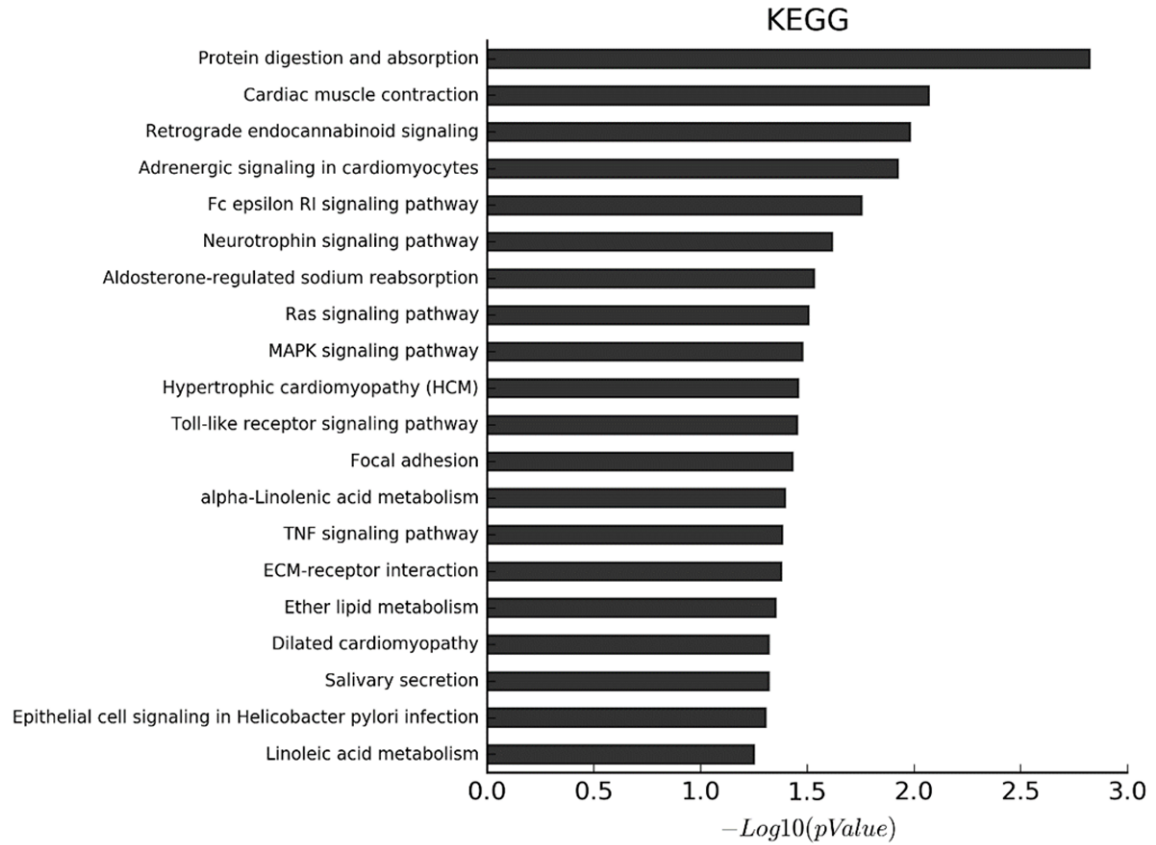

Supplementary Figure 2. Microarray analysis of Flot2-overexpressed HCC cells: KEGG analysis.
